RESEARCH ARTICLE

# Novel Temperate Phages of *Salmonella enterica* subsp. *salamae* and subsp. *diarizonae* and Their Activity against Pathogenic *S. enterica* subsp. *enterica* Isolates

Lenka Mikalová<sup>1</sup>✉, Juraj Bosák<sup>1</sup>✉, Hana Hříbková<sup>1</sup>, Daniela Dědičová<sup>2</sup>, Oldřich Benada<sup>3</sup>, Jan Šmarda<sup>1</sup>, David Šmajš<sup>1</sup>\*

**1** Department of Biology, Faculty of Medicine, Masaryk University, Kamenice 5, Brno, Czech Republic, **2** National Reference Laboratory for Salmonella, The National Institute of Public Health, Šrobárova, Prague, Czech Republic, **3** Institute of Microbiology of ASCR, v.v.i., Vídeňská, Prague, Czech Republic

✉ These authors contributed equally to this work.

\* [dsmajš@med.muni.cz](mailto:dsmajš@med.muni.cz)



**OPEN ACCESS**

**Citation:** Mikalová L, Bosák J, Hříbková H, Dědičová D, Benada O, Šmarda J, et al. (2017) Novel Temperate Phages of *Salmonella enterica* subsp. *salamae* and subsp. *diarizonae* and Their Activity against Pathogenic *S. enterica* subsp. *enterica* Isolates. PLoS ONE 12(1): e0170734. doi:10.1371/journal.pone.0170734

**Editor:** Mark J. van Raaij, Centro Nacional de Biotecnología, SPAIN

**Received:** November 7, 2016

**Accepted:** January 10, 2017

**Published:** January 24, 2017

**Copyright:** © 2017 Mikalová et al. This is an open access article distributed under the terms of the [Creative Commons Attribution License](https://creativecommons.org/licenses/by/4.0/), which permits unrestricted use, distribution, and reproduction in any medium, provided the original author and source are credited.

**Data Availability Statement:** All relevant data are within the paper and its Supporting Information files. Genome sequence files are available from the GenBank database (accession numbers KT630644, KT630645, KT 630646,KT 630648, and KT 630649).

**Funding:** The author (O.B.) gratefully acknowledge the support by the project LO1509 of the Ministry of Education, Youth and Sports of the Czech Republic and by Operational Program Prague

## Abstract

Forty strains of *Salmonella enterica* (*S. enterica*) subspecies *salamae* (II), *arizonae* (IIIa), *diarizonae* (IIIb), and *houtenae* (IV) were isolated from human or environmental samples and tested for bacteriophage production. Production of bacteriophages was observed in 15 *S. enterica* strains (37.5%) belonging to either the subspecies *salamae* (8 strains) or *diarizonae* (7 strains). Activity of phages was tested against 52 pathogenic *S. enterica* subsp. *enterica* isolates and showed that phages produced by subsp. *salamae* had broader activity against pathogenic salmonellae compared to phages from the subsp. *diarizonae*. All 15 phages were analyzed using PCR amplification of phage-specific regions and 9 different amplification profiles were identified. Five phages (SEN1, SEN4, SEN5, SEN22, and SEN34) were completely sequenced and classified as temperate phages. Phages SEN4 and SEN5 were genetically identical, thus representing a single phage type (i.e. SEN4/5). SEN1 and SEN4/5 fit into the group of P2-like phages, while the SEN22 phage showed sequence relatedness to P22-like phages. Interestingly, while phage SEN34 was genetically distantly related to Lambda-like phages (*Siphoviridae*), it had the morphology of the *Myoviridae* family. Based on sequence analysis and electron microscopy, phages SEN1 and SEN4/5 were members of the *Myoviridae* family and phage SEN22 belonged to the *Podoviridae* family.

## Introduction

At present, the *Salmonella* genus contains two species: *S. enterica* and *S. bongori* (V). *S. enterica* is further subdivided into six subspecies: *enterica* (I), *salamae* (II), *arizonae* (IIIa), *diarizonae* (IIIb), *houtenae* (IV), and *indica* (VI) [1–3]. Salmonellosis (infections transferred between humans and animals, mainly by contaminated food) represent an important, global, public

Competitiveness project (CZ.2.16/3.1.00/24023) supported by EU. This work was partly supported also by MUNI11/InGA04/2014 (to D.S.) and by GA16-21649S (to D.S.). This work was also supported by funds from the Faculty of Medicine, Masaryk University (ROZV/20/LF/2015), to junior researcher Lenka Mikalová-Pašteková. The funders had no role in study design, data collection and analysis, decision to publish, or preparation of the manuscript.

**Competing Interests:** The authors have declared that no competing interests exist.

health problem, with *S. enterica* subsp. *enterica* causing about 99% of the human cases [3–6]. Out of more than 2,600 *S. enterica* subsp. *enterica* serovars [7], relatively few serovars are important causative agents of salmonellosis [3]. While *S. enterica* subsp. *enterica* is typically found in warm-blooded animals, *S. enterica* subsp. *arizonae* and *S. bongori* are associated with cold-blooded animals. The other four subspecies of *S. enterica* can be isolated from both host types and can occasionally cause human infections [8–13].

Bacteriophages are the most abundant group of biological agents in our environment [14]. Tailed phages represent the dominant morphotype among characterized bacterial viruses as shown through electron microscopic examination of more than 5500 phages, in which 96% of phages were tailed [15]. Tailed phages also dominate with regard to the number of complete genome sequences; analysis of 607 complete phage genomes in the GenBank database revealed 506 (80%) tailed phages [16]. Tailed phages are in the *Caudovirales* order and are subdivided according to tail morphology into 3 families—*Myoviridae* (phages with long, contractile tails), *Siphoviridae* (phages with long, non-contractile tails), and *Podoviridae* (phages with short tails).

Based on a comparison of genome sequences of tailed enterobacterial phages [17], 77 *Salmonella* phages were found in 23 clusters including lytic phages (e.g. T4-like, T7-like, and SETP3-like) and temperate phages (e.g. Lambda-like, P2-like, and P22-like). In addition, 9371 prophages from 3298 *Salmonella* genomes were recently identified; out of them, 744 prophages belonged to the P22-like group and 4758 to the P2-like group [18].

*Salmonella* phages or prophages have been predominantly studied in strains of *S. enterica* subsp. *enterica*. In this communication, we focused on phage production by strains in the less common *S. enterica* subspecies *salamae*, *arizonae*, *diarizonae*, and *houtenae*. Genetic relatedness of identified phages and their activity spectra were determined. In addition, phages SEN1, SEN4/5, SEN22, and SEN34 were characterized by electron microscopy and whole genome sequencing.

## Materials and Methods

### Bacterial strains and culture media

From 1999–2005, 40 non-pathogenic strains of *S. enterica* subspecies *salamae*, *arizonae*, *diarizonae*, and *houtenae* (referred as Sen 1–40) were collected in the Czech Republic from human clinical samples and from environmental samples. All *S. enterica* strains were provided by The National Reference Laboratory for Salmonella, National Institute of Public Health (NIPH), Prague, Czech Republic. *Salmonella* strains were serotyped using the White-Kauffmann-Le Minor classification scheme [19] and their serotype characteristics are listed in [S1 Table](#).

For cultivation of bacteria in liquid culture, tryptone yeast (TY) medium with the following composition was used: yeast extract (HiMedia, Mumbai, India) 5g/L, casein enzyme hydrolysate (HiMedia) 8g/L, and NaCl (Penta, Prague, Czech Republic) 5g/L. TY agar plates were supplemented with a 1.5% (w/v) of agar (Hi-Media).

### Identification of lysogenic strains

Forty *S. enterica* strains were tested for bacteriophage production using a cross test method where each strain was tested as a possible producer as well as a possible indicator strain. In addition, four standard *E. coli* indicators (K12-Row, C6 ( $\phi$ ), B1, and P400), which were available in our laboratory strain collection [20–21], were used to detect phage producers. Briefly, each *Salmonella* strain was inoculated from a fresh TY broth culture into an agar base layer, 1.5% (w/v), using a sterile needle and then cultivated at 37°C for 48 hr. The resulting macrocolony was killed using chloroform vapors (30 min) and the plate was overlaid with a top layer

of 0.7% (w/v) agar enriched with a suspension of  $10^7$  indicator bacteria. Phage production was evaluated after overnight cultivation at 37°C.

### Determination of phage titer and inducibility of phages

Phage producers were inoculated into TY broth and incubated overnight. The fresh culture was diluted hundredfold with TY broth and cultivated for an additional 7 hr (37°C, 200 rpm). Subsequently, the culture was centrifuged at  $4000 \times g$  for 15 min to remove bacteria. The supernatant was transferred to a sterile tube and stored at 4°C with a few drops of chloroform to ensure sterility. To determine the concentration of phage particles, the sterile supernatant was serially diluted 10 times; each dilution was added to a suspension of phage-susceptible bacteria ( $10^7$  bacteria in 3 ml of the melted top layer of 0.7% agar) and spread on agar plates. After overnight cultivation, plaques were counted and the resulting bacteriophage titer was expressed as plaque forming units (PFU)/ml.

In parallel, induction of phage production was tested using the same protocol with a slight modification, which included the addition of mitomycin C (final concentration 0.1 µg/ml) to the culture of lysogenic strains during the exponential growth phase (i.e., after 4 hr of cultivation at 37°C, 200 rpm); cultivation continued for an additional 3 hr. Phage production was determined using a plaque counting technique. A comparison of phage titers counted from cultures with and without addition of mitomycin C indicated inducibility of phage production.

### Activity of phages against clinically important *Salmonella* isolates

Using the identified phage producers, we examined the activity of phages against a set of 52 clinically important *S. enterica* subsp. *enterica* isolates using the cross-test method described above. Clinical isolates belonged to common pathogenic serovars, i.e. Enteritidis (22 isolates), Typhimurium (13 isolates), Choleraesuis (4 isolates), Indiana (3 isolates), Derby (2 isolates), Mikawashima (2 isolates), Agona (1 isolate), Chester (1 isolate), Infantis (1 isolate), Java (1 isolate), Ohio (1 isolate), and San Diego (1 isolate). All these pathogenic strains were collected by The National Reference Laboratory for Salmonella, National Institute of Public Health (NIPH), Prague, Czech Republic, from patients living in the Czech Republic. The characteristics of the pathogenic strains are shown in [S1 Table](#).

### Analysis of PCR amplification profiles of phages

DNA from all phages was isolated using a QIAGEN Lambda Midi Kit (Qiagen, Hilden, Germany) per the protocol recommended by the manufacturer. Total bacteriophage DNA was digested using *EcoRI* enzyme (New England Biolabs, Ipswich, USA), cloned into the pUC19 cloning vector (New England Biolabs); the resulting clones were sequenced. The resulting sequences were compared with the GenBank database using BLAST to identify similarities to other phages. Subsequently, 12 DNA regions representing different phage genes were selected for primer design. The DNA from all phages was used as a template for PCR amplification ([Table 1](#)) and up to 2 genetic regions originating from the same phage were used for further screening. A list of genetic loci and the corresponding primer sequences are shown in [Table 1](#). Individual PCR reactions contained 0.4 µl of 10 mM dNTP mix, 1.8 µl of 10× ThermoPol Reaction buffer, 0.25 µl of each primer (100 pmol/µl), 0.05 µl of *Taq* polymerase (5000 U/ml), 1 µl of the tested phage DNA sample, and 15.2 µl of PCR grade water. PCR amplification was performed under the following cycling conditions: 94°C (2 min); 94°C (30 s), 60°C (30 s), 72°C (60 s), 30 cycles; 72°C (10 min). Resulting PCR products were sequenced with amplification primers. The resulting phage sequences were deposited in the GenBank under accession

**Table 1. List of primers used for amplification and sequencing of several phage genome regions.**

| Analyzed genome region | Phage template for primer design | Primer name | Primer sequence (5'-3') | Amplicon length (bp) | Target region encoding  |
|------------------------|----------------------------------|-------------|-------------------------|----------------------|-------------------------|
| GA1                    | SEN22                            | F4c5-F      | CAACTTGCCTGCTCTTTG      | 474                  | Terminase small subunit |
|                        |                                  | F4c5-R      | CGAAGGAAGCGTTAGACCTG    |                      |                         |
| GA2                    | SEN2                             | F3c7-F      | GTTGGGTGGAAGAAGCTGAA    | 413                  | Terminase large subunit |
|                        |                                  | F3c7-R      | AGCATCTGGCCCTGTATCTG    |                      |                         |
| GA3                    | SEN8                             | F20c3-F     | TTCAGTGGTGGTTCATGA      | 471                  | Portal protein          |
|                        |                                  | F20c3-R     | GCGTTAAGAAGCCAGAAACG    |                      |                         |
| GA4                    | SEN8                             | F20c5-F     | TTATTTGCTGCGCTGACATC    | 494                  | Scaffolding protein     |
|                        |                                  | F20c5-R     | TCAGAAGAAGCCCTGGCTAA    |                      |                         |
| GA5                    | SEN23                            | F6c1-F      | GGCCGATCAGTTGCTTAAAA    | 232                  | Integrase               |
|                        |                                  | F6c1-R      | CTCATGCCCCAACATTTTCT    |                      |                         |
| GA6                    | SEN4                             | F9c2-F      | GCCGCTGATAACCCAGAAA     | 456                  | Methyltransferase       |
|                        |                                  | F9c2-R      | CGTTTTCCAGATCAGCCTGT    |                      |                         |
| GA7                    | SEN34                            | F38c2-F     | AAGTGGGAACTGCTGAAGA     | 487                  | Replication protein O   |
|                        |                                  | F38c2-R     | AACGCTGCCATAAGCTGACT    |                      |                         |
| GA8                    | SEN1                             | F1c3-F      | AAAGCCGGTTAGGTAGCTC     | 456                  | Replication protein     |
|                        |                                  | F1c3-R      | ATCGCTCGCATGTTAACG      |                      |                         |
| GA9                    | SEN22                            | F4c4-F      | AATGGATGCAGTCAGGAAG     | 421                  | Nin locus               |
|                        |                                  | F4c4-R      | GTCAATCATCGCGTTTTCT     |                      |                         |
| GA10                   | SEN5                             | F10c1-F     | TTCGCAAAATGAAATCGAGTG   | 443                  | Hypothetical protein    |
|                        |                                  | F10c1-R     | ATCGGCAACTTACCGTCATC    |                      |                         |
| GA11                   | SEN23                            | F6c4-F      | GTTGTTTCAGGCCGTTGATTT   | 284                  | Hypothetical protein    |
|                        |                                  | F6c4-R      | GTACATCGCCTGAAGGGAGA    |                      |                         |
| GA12                   | SEN34                            | F38c1-F     | GTTTATGGCGTGAAAAGGA     | 457                  | Hypothetical protein    |
|                        |                                  | F38c1-R     | GTTGTTTCAGGCCGTTGATTT   |                      |                         |

doi:10.1371/journal.pone.0170734.t001

numbers KM202139, KM202140, KM202142 –KM202144, KM202151 –KM202154, KM202157, KM202158, KM202160, KM202164 –KM202167, KM202171 –KM202176, KM202179, KM202181 –KM202184, and KM202186 –KM202195.

### Preparation of phage stock

Bacteriophage stock was prepared from a single selected plaque [22] that was resuspended in 100 µl of TY broth containing 0.01M CaCl<sub>2</sub>. This phage suspension was added to 0.7% TY agar containing 10<sup>7</sup> phage-susceptible bacteria (i.e., they did not produce their own bacteriophages) and spread on agar plate. After overnight cultivation, the bacteriophage-containing top layer of TY agar, with confluent lysis, was collected into a sterile tube and resuspended in 3 ml of SM buffer (100 mM NaCl, 8 mM MgSO<sub>4</sub>\*7H<sub>2</sub>O, 50 mM Tris-Cl, 0.01% (w/v) gelatine) and 0.5 ml of chloroform. The tube was incubated at 37°C for 20 min and the suspension was centrifuged at 4000 × g for 15 min to remove bacteria and agar residue. The supernatant, containing the phage particles, was transferred to a sterile tube and few drops of chloroform were added.

### Isolation of bacteriophage DNA for whole genome sequencing

The bacterial stocks originated from single plaques multiplied in indicator strains (i.e., did not produce their own phages) were used for propagation of phages and isolation of phage DNA (see above). Phages were propagated per previously published protocols [22]. Briefly, 200 ml of TY broth was inoculated with 2 ml of fresh phage indicator culture and cultivated for 4.5 hr

(37°C, 250 rpm). Thereafter, 200 µl of 0.02M CaCl<sub>2</sub> and phage particles ( $\approx 10^8$ ) from our phage stock were added and cultivation continued for an additional 4.5 hr (37°C, 250 rpm). Finally, the bacterial culture was lysed using chloroform (10 min, 37°C, 250 rpm). Bacterial nucleic acids in lysates were degraded using RNase A and DNase I (final conc. 1 µg/ml, 45 min, RT) and phage particles were precipitated using NaCl (1M, 1 hr, 4°C) and PEG 8000 (10%, 16 hr, 4°C). After centrifugation (11,000 × g, 11 min, 4°C), the pellet was resuspended in 5 ml of SM buffer and phage particles were purified using isopycnic ultracentrifugation in a CsCl gradient (87,000 × g, 2 hr, 4°C). The collected bacteriophage suspension was dialyzed with dialysis buffer (10 mM NaCl, 50 mM Tris-Cl, 10 mM MgCl<sub>2</sub>) for 2 × 1 hr. The dialyzed phage suspension was treated with EDTA (final conc. 20 mM), proteinase K (final conc. 50 µg/ml) and SDS (final conc. 0.5%) for 1 hr at 56°C. Phage DNA was isolated by phenol-chloroform, precipitated by isopropanol, and finally diluted in 50 µl of TE buffer.

## Whole-genome sequencing and analysis of phage genomes

Genomic DNA of 5 phages was sequenced using Ion Torrent™ next-gen sequencing technology (Life Technologies, Carlsbad, USA) at SeqOmics Biotechnology Ltd (Mórahalom, Hungary). All genomes were assembled *de novo* using SeqMan NGen software from a Lasergene v.10 genomics package (DNASTAR, Madison, USA). Genomes were annotated using RAST (Rapid Annotation using Subsystem Technology), a fully-automatic annotation service [23], followed by manual correction based on the BLASTX algorithm [24]. Genomes were deposited in GenBank under the following numbers: SEN1 (KT630644); SEN4 (KT630645), SEN5 (KT 630646), SEN22 (KT 630648), and SEN34 (KT 630649). Genomes of *Salmonella* phages were analyzed using the Lasergene program package (DNASTAR). BLAST comparisons of phage genomes were produced with Easyfig [25]. Average nucleotide identity (ANI) of phages was calculated by the JSspeciesWeb Server running MUMmer 3.0 software [26, 27].

## Electron microscopy

Phage samples for electron microscopy were prepared from phage stocks (originated from a single plaque) according to previously published protocols [22]. Phage suspensions were subsequently precipitated with polyethylene glycol (PEG) and purified using centrifugation in a CsCl gradient [22]. Bacteriophage particles were visualized using a negative staining method. Briefly, phage suspensions (5 µl) were placed on glow discharge activated carbon-coated grids [28]. After an adsorption period (30 s), the unabsorbed liquid material was removed using filter paper. The electron-microscopic grids were then stained with 10 µl of 1% phosphotungstic acid, 2% uranyl acetate, or 2% ammonium molybdate for 10–30 s; excess staining solution was removed using filter paper. Samples were viewed using a MORGAGNI 268D (FEI, Hillsboro, OR, USA) or a Philips CM 100 transmission electron microscope (FEI).

## Results

### Characterization of non-pathogenic *Salmonella enterica* strains and identification of lysogenic strains

All non-pathogenic *S. enterica* strains used in this study (n = 40) were classified into subspecies based on biochemical markers and serotyped using the White-Kaufmann-LeMinor scheme. A total of 16 strains belonged to *S. enterica* subsp. *salamae*, 5 strains to subsp. *arizonae*, 15 strains to subsp. *diarizonae*, and 4 strains to subsp. *houtenae*. Strains mostly came from human feces or other human material, and from waste water sludge. In 7 cases, the origin of the strain was unknown (S1 Table).

**Table 2. Phage producers and indicator strains of identified phages.**

| Phage producer ( <i>S. enterica</i> subspecies) | Susceptible indicator strains                  |                  | PFU/ml                | Plaque diameter (mm) |
|-------------------------------------------------|------------------------------------------------|------------------|-----------------------|----------------------|
|                                                 | <i>S. enterica</i>                             | <i>E. coli</i>   |                       |                      |
| Sen1 ( <i>salamae</i> )*                        | Sen4, Sen5, Sen6, Sen9, Sen11                  | P400, <u>B1</u>  | 2.8 × 10 <sup>4</sup> | 1.5 ± 0.06           |
| Sen2 ( <i>salamae</i> )*                        | Sen11, <u>Sen17</u> , Sen26                    | -                | 2.9 × 10 <sup>6</sup> | 0.8 ± 0.06           |
| Sen4 ( <i>salamae</i> )                         | Sen38                                          | <u>P400</u> , B1 | 9.2 × 10 <sup>3</sup> | 0.5 ± 0.05           |
| Sen5 ( <i>salamae</i> )                         | Sen38                                          | P400, <u>B1</u>  | 6.9 × 10 <sup>3</sup> | 0.5 ± 0.06           |
| Sen6 ( <i>salamae</i> )*                        | <u>Sen9</u> , Sen33                            | -                | 2.7 × 10 <sup>4</sup> | 0.3 ± 0.06           |
| Sen8 ( <i>salamae</i> )                         | Sen6, <u>Sen9</u> , Sen10, Sen36, Sen38, Sen40 | -                | 1.5 × 10 <sup>5</sup> | 0.7 ± 0.05           |
| Sen14 ( <i>salamae</i> )*                       | <u>Sen11</u>                                   | P400, B1         | 6.1 × 10 <sup>4</sup> | 0.5 ± 0.05           |
| Sen16 ( <i>salamae</i> )                        | Sen38, Sen6, Sen9, Sen10, Sen11, Sen40, Sen36  | P400, <u>B1</u>  | 1.6 × 10 <sup>5</sup> | 1.6 ± 0.05           |
| Sen22 ( <i>diarizonae</i> )*                    | Sen26, <u>Sen39</u> , Sen34                    | -                | 4.0 × 10 <sup>6</sup> | 1.2 ± 0.08           |
| Sen23 ( <i>diarizonae</i> )*                    | Sen11, Sen22, Sen24, <u>Sen39</u>              | -                | 3.4 × 10 <sup>4</sup> | 0.4 ± 0.07           |
| Sen24 ( <i>diarizonae</i> )                     | <u>Sen26</u> , Sen39                           | -                | 1.5 × 10 <sup>4</sup> | 1.1 ± 0.07           |
| Sen30 ( <i>diarizonae</i> )*                    | <u>Sen9</u>                                    | -                | 7.2 × 10 <sup>3</sup> | 1.1 ± 0.05           |
| Sen31 ( <i>diarizonae</i> )                     | <u>Sen9</u>                                    | -                | 1.3 × 10 <sup>3</sup> | 1.1 ± 0.06           |
| Sen34 ( <i>diarizonae</i> )*                    | Sen23, Sen24, <u>Sen26</u> , Sen39             | -                | 5.2 × 10 <sup>4</sup> | 1.3 ± 0.07           |
| Sen35 ( <i>diarizonae</i> )                     | -                                              | P400, <u>B1</u>  | 6.5 × 10 <sup>4</sup> | 0.7 ± 0.05           |

\*phage production was induced by mitomycin C; PFU—plaque forming unit  
Indicator strains used for preparation of phage stocks are underlined.

doi:10.1371/journal.pone.0170734.t002

All forty *S. enterica* strains were tested against each other (i.e., in 1,600 individual tests), as potential phage producers and phage indicators. In addition to *S. enterica* strains, four standard *E. coli* phage-indicator strains (i.e., K12-Row, C6 (φ), B1, and P400) were used. The results are summarized in Table 2. Production of bacteriophages was observed in 15 non-pathogenic *S. enterica* strains (37.5%) (Sen1, Sen2, Sen4, Sen5, Sen6, Sen8, Sen14, Sen16, Sen22, Sen23, Sen24, Sen30, Sen31, Sen34, and Sen35) belonging to either subspecies *salamae* (8 strains) or *diarizonae* (7 strains). All phages formed small turbid plaques without a lytic halo. Plaque sizes varied from 0.3–1.6 mm in diameter. Bacteriophage titers obtained from non-induced cultures ranged from 1.3 × 10<sup>3</sup> to 4.0 × 10<sup>6</sup> PFU/ml. Moreover, mitomycin C induction of phages was effective in 8 out of 15 phage producers (Table 2), increasing the phage titer by two orders of magnitude.

### Analysis of phage activity against pathogenic *S. enterica* clinical isolates

Activity of all 15 phages from identified phage producers was tested against 52 pathogenic *S. enterica* subsp. *enterica* isolates belonging to common pathogenic serovars. The activity spectra of phages are shown in Fig 1. Two strains, i.e. Sen1 and Sen8, produced phages, which lysed the majority of pathogenic isolates, while phages produced by Sen4, Sen5, Sen6, Sen16, Sen34, and Sen35 strains inhibited less than 20% of isolates. Moreover, all pathogenic *Salmonella* isolates were resistant to phages produced by strains Sen2, Sen14, Sen22, Sen23, Sen24, Sen30, and Sen31. In general, phages from subsp. *salamae* showed broader activity against pathogenic salmonellae compared to phages from subsp. *diarizonae*.

### Analysis of phage PCR amplification profiles

Variability of identified phages (denoted as “SEN” throughout the manuscript) was analyzed using PCR amplification of several loci obtained during construction of small libraries of



### Morphology of phage particles

Phages SEN1, SEN4, and SEN5 from producers belonging to subsp. *salamae*, and phages SEN22 and SEN34 from producers belonging to subsp. *diarizonae* were characterized using electron microscopy. A phage suspension obtained from a single plaque was negatively stained and examined with a transmission electron microscope to determine phage morphology. The morphology of phage particles is summarized in Fig 3. Phages SEN1, SEN4, SEN5, and SEN34, shared the same morphology, i.e. a head with icosahedral symmetry and a long contractile tail. Diameters of icosahedral capsids ranged from 54.0–58.3 nm and the length of the tail, including the contractile sheath, ranged from 107.3–148.9 nm. In contrast, phage SEN22 had an icosahedral head (57.8 nm in width; 55 nm in length) with very short noncontractile tail (18.4 nm in width; 15.0 nm in length). Based on previous classifications [29], the first morphological group corresponds to the *Myoviridae* family, and the second morphological group corresponds to the *Podoviridae* family.

### Whole genome analysis

Whole genome sequencing of phages SEN1, SEN4, SEN5, SEN22, and SEN34 was performed. The main characteristics of phage genomes are shown in Table 3. Genome length of the sequenced phages ranged from 29.7–41.3 kb with G+C content ranging from 47.8–53.4%. Genome lengths were correlated with genome sizes, which were estimated from PFGE (data not shown), indicating that complete genome sequences had been obtained. While the *cos* site, identical to predicted cohesive ends of phage Psp3 (ggcgtggcgggaaagcat), was found for SEN1, sticky ends of phages SEN4 and SEN5 (ggcgaggcgggggaacgag) were more similar to the *cos* site of phage P2. In addition, a *pac* sequence (gaagattatctgaagtcgta) identical to that of P22 phage was identified for phage SEN22. Due to unusual SEN34 genome (see below), the packaging-responsible sequences were not identified in the SEN34 genome. All sequenced phages encoded integrase, a characteristic of temperate phages.



| Phage producer | Dimensions of phage particle (nm) |              |                   | Phage classification to family |
|----------------|-----------------------------------|--------------|-------------------|--------------------------------|
|                | Head                              | Tail         | Contracted sheath |                                |
| SEN1           | 55.6 × 54.0                       | 129.5 × 19.3 | 57.9 × 26.3       | <i>Myoviridae</i>              |
| SEN4           | 55.7 × 54.6                       | 148.9 × 16.4 | 68.3 × 22.8       | <i>Myoviridae</i>              |
| SEN5           | 55.0 × 54.3                       | 144.7 × 16.0 | 65.3 × 21.2       | <i>Myoviridae</i>              |
| SEN22          | 57.8 × 55.0                       | 15.0 × 18.4  | -                 | <i>Podoviridae</i>             |
| SEN34          | 55.4 × 58.3                       | 107.3 × 12.0 | 52.4 × 17.0       | <i>Myoviridae</i>              |

**Fig 3. Morphology of *Salmonella* phages.** Electron microscopy of negatively stained phage particles isolated from the producer strain Sen1 (A), Sen4 and Sen5 (phage SEN4/5) (B), Sen22 (C), and Sen34 (D). While phage SEN22 belongs to family *Podoviridae*, other phages showed morphology of family *Myoviridae*. Bar scale represents 40 nm. Dimensions of phage virions are shown in table.

doi:10.1371/journal.pone.0170734.g003



**Table 3. Genome characteristics of newly sequenced *Salmonella* phages.**

| Phage | Host ( <i>S. enterica</i> subsp.) | Genome size (bp) | No. of reads (average coverage) | G+C content (%) | No. of predicted genes | The most similar phage (e-value/ANI %)*        | Genbank Acc. No. |
|-------|-----------------------------------|------------------|---------------------------------|-----------------|------------------------|------------------------------------------------|------------------|
| SEN1  | <i>salamae</i>                    | 29733            | 9163 (67×)                      | 53.01           | 43                     | Enterobacteria phage PsP3 (0.0/97.11%)         | KT630644         |
| SEN4  | <i>salamae</i>                    | 33509            | 14313 (94×)                     | 53.36           | 47                     | no similarity <sup>#</sup>                     | KT630645         |
| SEN5  | <i>salamae</i>                    | 33509            | 14619 (95×)                     | 53.36           | 47                     | no similarity                                  | KT630646         |
| SEN22 | <i>diarizonae</i>                 | 41338            | 15702 (72×)                     | 47.83           | 55                     | <i>Salmonella</i> phage epsilon34 (0.0/94.11%) | KT630648         |
| SEN34 | <i>diarizonae</i>                 | 40740            | 19506 (108×)                    | 49.91           | 63                     | no similarity                                  | KT630649         |

\*BLASTN analysis of whole genome phage sequences was performed against a database of viruses (taxid:10239) and results were ranked based on the total score. Average nucleotide identity (ANI) of the most similar phages was calculated by the JSspeciesWeb Server.

<sup>#</sup>phage genome sequences showing similarity in less than 10% of genome length were marked as “no similarity”

doi:10.1371/journal.pone.0170734.t003

A BLASTN analysis of whole genomes (Table 3) revealed substantial similarity (ANI: 97.11%) between phage SEN1 and phage PsP3 (a phage belonging to the P2-like group) (GenBank No. AY135486). The genome of phage SEN1 was also very similar (ANI: 81.69%) to the prototype phage P2 (GenBank No. KC618326), especially in the morphogenesis region. Besides the genetic variability found in the region responsible for replication, the lysogenic conversion locus was not present in the SEN1 genome and the region encoding tail fibers differed between SEN1 and P2 phages (Fig 4A). In fact, the tail fiber gene of SEN1 (gp19) was related to another P2-like phage, *Salmonella* phage RE-2010 (GenBank No. HM770079).

Whole genome sequencing of phages SEN4 and SEN5 revealed that these phages were identical (Table 3), thus representing a single phage type, denoted as phage SEN4/5. Whole genome analysis of SEN4/5, based on BLASTN, found similarities to the prophage sequence within the genome of *Enterobacter cloacae* complex (GenBank No. CP012162), but not to any known phages (Table 3); however, BLASTP analysis of predicted SEN4/5 proteins showed a distant similarity to several P2-like phages (Fig 4A and S2 Table). Nonetheless, the average nucleotide identity with the P2 phage was calculated to be 0.00%. Thus, SEN4/5 appears to belong to the P2-like phages, but it is clearly different from previously known members.

Both SEN22 and SEN34 phages, isolated from subsp. *diarizonae*, showed larger genomes compared to subsp. *salamae* phages (Table 3). The genome of phage SEN22 was found to be related to several P22-like phages having the greatest similarity (ANI: 94.11%) to *Salmonella* phage ε34 (GenBank No. NC\_011976). The SEN22 genome region encoding the head of the virion was more similar to prototype phage P22 than the region encoding the virion tail and the region responsible for regulation and replication (Fig 4B). In addition, four insertions of mobile elements were identified in the SEN22 genome, including a unique insertion of a homing endonuclease gene between the terminase gene and the portal protein gene.

BLASTN analysis of the SEN34 genome sequence revealed a low degree of similarity to the prophage sequence within the genome of *S. enterica* subsp. *enterica* serovar Newport str. CVM 21550 (GenBank No. CP010283), but not to any known phages (Table 3), while the BLASTP analysis of predicted proteins showed that there was a distant similarity between the SEN34 virion assembly genes and two uncharacterized phages including the *Burkholderia* phage Bups phi1 and *Acinetobacter* phage Ab105-1phi (S2 Table). Additionally, the region responsible for replication and regulation of SEN34 was similar to several Lambda-like phages (Fig 4B and S2 Table). When all these observations are taken together, SEN34 appears to be a new phage type (ANI with Lambda phage: 0.00%).



**Fig 4. Genome analyses of sequenced phages SEN1, SEN4/5, SEN22, and SEN34.** Genome comparison of phages isolated from subsp. *salamae* (A) and from subsp. *diarizonae* (B). Schematic organization of genes in phage genomes (head-tail-regulation-replication) is shown with bold black lines. The most variable genes (i.e., those encoding DNA transfer proteins and tail fibers) are shown in blue. Genes for integration (*int*) are violet, genes encoding lysis are black, the locus responsible for O antigen modification (*gtr*) is yellow, the locus for lysogenic conversion (*cor*) is grey, and the locus for recombination (*rec*) is white. Mobile elements (transposons, HNH endonucleases) are green and the remaining genes are orange. Comparisons of phage genomes were prepared using Easyfig software [25]; similarity between phages (> 65%) is shown using a gray scale (bottom left).

doi:10.1371/journal.pone.0170734.g004

## Discussion

To date, almost 200 phage types have been identified in the genus *Salmonella* [30] and if prophages are included, the number is greater than 9,000 [18]. Prophages appear to be very common in *Salmonella*, as shown by production of 136 functional phages from 173 *S. enterica* subsp. *enterica* (serovar Typhimurium) isolates [31]. It has been calculated that there are, on average, 2.8 known prophages present per *Salmonella* genome [18]. While phages and prophages of subsp. *enterica* have been intensively studied (reviewed in [18, 30, 32]), information on phages in other *Salmonella* subspecies is scarce. In fact, putative prophage sequences were

only recently identified in the whole genome sequences of two strains belonging to non-*enterica* subspecies, i.e. in subsp. *arizonae* (GenBank: CP000880.1; prophage Sari1; [33]), and subsp. *salamae* (GenBank: ATFA01000000; [34]). This study focused on phage production within strains *S. enterica* subspecies *salamae*, *arizonae*, *diarizonae*, and *houtenae*. While fifteen phage producers were identified in subspecies *salamae* and *diarizonae*, no producers were identified in subspecies *arizonae* and *houtenae*; however, it is unclear if this difference is due to the relatively low number of investigated strains in the second group (9 out of 40) or due to other factors.

Out of 15 identified phages, SEN1, SEN4/5, SEN22, and SEN34 were further characterized. Bacteriophages SEN1, SEN4/5, and SEN34 belonged to the *Myoviridae* family, while SEN22 showed morphology typical of the *Podoviridae* family. These findings are in accordance with the fact that the majority of known phages belongs to the *Myoviridae* family [35].

Analysis of phage genomes revealed that these phages represent novel types. All sequenced phages encoded integrase, a characteristic of temperate phages. While phages SEN1 and SEN22 showed close sequence relatedness to prototype phages P2 and P22, respectively, phages SEN4/5 and SEN34 were quite different from known phages. Our findings are in accordance with a study by Casjens and Grose [18], where SEN4/5 genomic sequences formed a new, well defined, subcluster within the P2-like cluster. Phage SEN34 was similar to several disparate Lambda-like phages, but did not belong to any of the 17 known lambda clusters described by Grose and Casjens [17]. Thus, phage SEN34 is a representative of a new lambda cluster. This is in accordance with a recent comprehensive study of enterobacterial prophages [18], where the authors analyzed the available phage genomes from GenBank database and defined a new lambda phage cluster (“temperate 26”) with prototype phage SEN34. Although phage SEN34 is genetically related to Lambda-like phages, morphologically it is a member of the *Myoviridae* family (in contrast to Lambda phages, which belong to the *Siphoviridae* family). A similar discrepancy between genomic relatedness and morphology classification has also been shown for the LP65 phage, which had a *Myoviridae* morphology, however, it had a genome organization similar to the Lambda phage [36].

The additional 10 unsequenced phages identified in this study, likely represent distinct phage types as revealed by (i) differences in amplification profiles of various genomic regions, (ii) analyses of the sources of *Salmonella* strains, (iii) the spectra of indicator strains, and (iv) inducibility with mitomycin C.

Genomes of temperate phages sequenced in our study showed genome mosaicism, where several parts of the phage genomes were related to several different phages. This is in agreement with previous comparative analyses showing that the morphogenesis region is relatively conserved, while genome mosaicism is prevalent in the early regions of phage genomes [17, 37–40].

Besides common mosaicism in the early region, genes encoding proteins interacting with the host showed increased genetic diversity. The DNA encoding receptor-binding tailspike protein domain is among the most highly exchanged parts of the tailed phages. It is evolutionarily useful for phages to acquire new receptor specificities by swapping this domain through horizontal gene transfer [33]. While sequenced phages produced by the subsp. *salamae* showed a similarity to the region encoding tail fibers in the P2-like *Salmonella* phage RE-2010, no sequence similarity was found for the SEN22 and SEN34 phages.

Phages produced by strains belonging to subsp. *salamae* showed a broader activity spectra against pathogenic isolates of subsp. *enterica* compared to phages from subsp. *diarizonae*. This is in accordance with results from a phylogenetic study of *Salmonella* subspecies [41], which showed a close relationship between subsp. *salamae* and subsp. *enterica*. The observed broad activity of phages SEN1 and SEN8 against pathogenic salmonellae opens up the possibility of

finding therapeutic applications for these phages, however, the presence of lysogenic cycles in these phages makes such therapeutic applications rather potential.

## Conclusions

In this study, we determined phage production in *S. enterica* subspecies *salamae*, *arizonae*, *diarizonae*, and *houtenae*. Out of 15 identified phage producers, five complete phage genomes were determined and four different temperate phages were identified. Phages SEN1 and SEN4/5 clustered with P2-like phages, while phage SEN22 showed sequence relatedness to P22-like phages. Phage SEN34 was distantly related to Lambda-like phages (*Siphoviridae*), but had a morphology that was characteristic of *Myoviridae*.

## Supporting Information

**S1 Table. The list of *Salmonella* strains used in this study.**

(DOCX)

**S2 Table. BLASTP analysis of predicted proteins in sequenced phages.**

(DOCX)

## Acknowledgments

We thank Thomas Secrest (Secrest Editing, Ltd.) for his assistance with the English revision of the manuscript.

## Author Contributions

**Conceptualization:** JB LM DS.

**Data curation:** JB LM.

**Funding acquisition:** DS OB LM.

**Investigation:** JB LM HH.

**Methodology:** JB LM.

**Project administration:** JB LM.

**Resources:** DD.

**Supervision:** DS JS.

**Validation:** JB LM.

**Writing – original draft:** JB LM DS.

**Writing – review & editing:** OB JS.

## References

1. Judicial Commission of the International Committee on Systematics of Prokaryotes. The type species of the genus *Salmonella* Lignieres 1900 is *Salmonella enterica* (ex Kauffmann and Edwards 1952) Le Minor and Popoff 1987, with the type strain LT2T, and conservation of the epithet *enterica* in *Salmonella enterica* over all earlier epithets that may be applied to this species. Opinion 80. Int J Syst Evol Microbiol. 2005; 55:519–20. doi: [10.1099/ijs.0.63579-0](https://doi.org/10.1099/ijs.0.63579-0) PMID: [15653929](https://pubmed.ncbi.nlm.nih.gov/15653929/)
2. Tindall BJ, Grimont PAD, Garrity GM, Euzéby JP. Nomenclature and taxonomy of the genus *Salmonella*. Int J Syst Evol Microbiol. 2005; 55:521–24. doi: [10.1099/ijs.0.63580-0](https://doi.org/10.1099/ijs.0.63580-0) PMID: [15653930](https://pubmed.ncbi.nlm.nih.gov/15653930/)

3. Lan R, Reeves PR, Octavia S. Population structure, origins and evolution of major *Salmonella enterica* clones. *Infect Genet Evol.* 2009; 9:996–1005. doi: [10.1016/j.meegid.2009.04.011](https://doi.org/10.1016/j.meegid.2009.04.011) PMID: [19393770](https://pubmed.ncbi.nlm.nih.gov/19393770/)
4. Scallan E, Hoekstra RM, Angulo FJ, Tauxe RV, Widdowson MA, Roy SL, et al. Foodborne illness acquired in the United States—major pathogens. *Emerg Infect Dis.* 2011; 17:7–15. doi: [10.3201/eid1701.P111101](https://doi.org/10.3201/eid1701.P111101) PMID: [21192848](https://pubmed.ncbi.nlm.nih.gov/21192848/)
5. European Food Safety Authority. The European Union summary report on trends and sources of zoonoses, zoonotic agents and food-borne outbreaks in 2014. *EFSA J* 2015; 13:4329.
6. Centers for Disease Control and Prevention (CDC). Surveillance for Foodborne Disease Outbreaks, United States, 2014, Annual Report. Atlanta, Georgia: US Department of Health and Human Services, CDC, 2016. [WWW document] URL [www.cdc.gov/foodsafety/pdfs/foodborne-outbreaks-annual-report-2014-508.pdf](http://www.cdc.gov/foodsafety/pdfs/foodborne-outbreaks-annual-report-2014-508.pdf)
7. Guibourdenche M, Roggentin P, Mikoleit M, Fields PI, Bockemühl J, Grimont PAD, et al. Supplement 2003–2007 (No. 47) to the White-Kauffmann-Le Minor scheme. *Res Microbiol.* 2010; 161:26–9. doi: [10.1016/j.resmic.2009.10.002](https://doi.org/10.1016/j.resmic.2009.10.002) PMID: [19840847](https://pubmed.ncbi.nlm.nih.gov/19840847/)
8. Snehalatha S, Mathai E, Jayasheela M, Chandy M, Lalitha MK, John TJ. *Salmonella choleraesuis* subsp. *indica* serovar bornheim causing urinary tract infection. *J Clin Microbiol.* 1992; 30:2504–5. PMID: [1401026](https://pubmed.ncbi.nlm.nih.gov/1401026/)
9. Giammanco GM, Pignato S, Mammina C, Grimont F, Grimont PAD, Nastasi A, et al. Persistent endemicity of *Salmonella bongori* 48:z(35):—in Southern Italy: molecular characterization of human, animal, and environmental isolates. *J Clin Microbiol.* 2002; 40:3502–5. doi: [10.1128/JCM.40.9.3502-3505.2002](https://doi.org/10.1128/JCM.40.9.3502-3505.2002) PMID: [12202604](https://pubmed.ncbi.nlm.nih.gov/12202604/)
10. Schröter M, Roggentin P, Hofmann J, Speicher A, Laufs R, Mac D. Pet snakes as a reservoir for *Salmonella enterica* subsp. *diarizonae* (Serogroup IIIb): a prospective study. *Appl Environ Microbiol.* 2004; 70:613–5. doi: [10.1128/AEM.70.1.613-615.2004](https://doi.org/10.1128/AEM.70.1.613-615.2004) PMID: [14711697](https://pubmed.ncbi.nlm.nih.gov/14711697/)
11. Tabarani CM, Bennett NJ, Kiska DL, Riddell SW, Botash AS, Domachowske JB. Empyema of preexisting subdural hemorrhage caused by a rare *Salmonella* species after exposure to bearded dragons in a foster home. *J Pediatr.* 2010; 156:322–3. doi: [10.1016/j.jpeds.2009.07.050](https://doi.org/10.1016/j.jpeds.2009.07.050) PMID: [20105642](https://pubmed.ncbi.nlm.nih.gov/20105642/)
12. Abbott SL, Ni FCY, Janda JM Increase in extraintestinal infections caused by *Salmonella enterica* sub-species II-IV. *Emerg Infect Dis.* 2012; 18:637–9. doi: [10.3201/eid1804.111386](https://doi.org/10.3201/eid1804.111386) PMID: [22469432](https://pubmed.ncbi.nlm.nih.gov/22469432/)
13. Kolker S, Itsekzon T, Yinnon AM, Lachish T. Osteomyelitis due to *Salmonella enterica* subsp. *arizonae*: the price of exotic pets. *Clin Microbiol Infect.* 2012; 18:167–70. doi: [10.1111/j.1469-0691.2011.03533.x](https://doi.org/10.1111/j.1469-0691.2011.03533.x) PMID: [21745257](https://pubmed.ncbi.nlm.nih.gov/21745257/)
14. Casjens SR. Comparative genomics and evolution of the tailed-bacteriophages. *Curr Opin Microbiol.* 2005; 8:451–8. doi: [10.1016/j.mib.2005.06.014](https://doi.org/10.1016/j.mib.2005.06.014) PMID: [16019256](https://pubmed.ncbi.nlm.nih.gov/16019256/)
15. Ackermann HW. 5500 Phages examined in the electron microscope. *Arch Virol.* 2007; 152:227–43. doi: [10.1007/s00705-006-0849-1](https://doi.org/10.1007/s00705-006-0849-1) PMID: [17051420](https://pubmed.ncbi.nlm.nih.gov/17051420/)
16. Krupovic M, Prangishvili D, Hendrix RW, Bamford DH. Genomics of bacterial and archaeal viruses: dynamics within the prokaryotic virosphere. *Microbiol Mol Biol Rev.* 2011; 75:610–35. doi: [10.1128/MMBR.00011-11](https://doi.org/10.1128/MMBR.00011-11) PMID: [22126996](https://pubmed.ncbi.nlm.nih.gov/22126996/)
17. Grose JH, Casjens SR. Understanding the enormous diversity of bacteriophages: the tailed phages that infect the bacterial family *Enterobacteriaceae*. *Virology.* 2014; 468–470:421–43. doi: [10.1016/j.virol.2014.08.024](https://doi.org/10.1016/j.virol.2014.08.024) PMID: [25240328](https://pubmed.ncbi.nlm.nih.gov/25240328/)
18. Casjens SR, Grose JH. Contributions of P2- and P22-like prophages to understanding the enormous diversity and abundance of tailed bacteriophages. *Virology.* 2016; 496:255–76. doi: [10.1016/j.virol.2016.05.022](https://doi.org/10.1016/j.virol.2016.05.022) PMID: [27372181](https://pubmed.ncbi.nlm.nih.gov/27372181/)
19. Grimont PAD, Weill FX. Antigenic formulae of the *Salmonella* serovars, 9th ed. WHO Collaborating Centre for Reference and Research on Salmonella. Institut Pasteur, Paris, France. [WWW document] URL [www.scacm.org/free/Antigenic Formulae of the \*Salmonella\* Serovars 2007 9th edition.pdf](http://www.scacm.org/free/Antigenic%20Formulae%20of%20the%20Salmonella%20Serovars%202007%209th%20edition.pdf)
20. Šmarda J, Šmajš D, Horynová S. Incidence of lysogenic, colicinogenic and siderophore-producing strains among human non-pathogenic *Escherichia coli*. *Folia Microbiol.* 2006; 51:387–91.
21. Šmajš D, Micenková L, Šmarda J, Vrba M, Ševčíková, Vališová Z, et al. Bacteriocin synthesis in uropathogenic and commensal *Escherichia coli*: colicin E1 is a potential virulence factor. *BMC Microbiol.* 2010; 10:e288.
22. Sambrook J, Russell DW. Molecular cloning: a laboratory manual, 3rd ed, vol 1. Cold Spring Harbor, NY, USA: Cold Spring Harbor Laboratory Press. 2001.
23. Aziz RK, Bartels D, Best AA, DeJongh M, Disz T, Edwards RA, et al. The RAST Server: Rapid Annotations using Subsystems Technology. *BMC Genomics.* 2008; 9:e75.
24. Altschul SF, Gish W, Miller W, Myers EW, Lipman DJ. Basic local alignment search tool. *J Mol Biol.* 1990; 215:403–10. doi: [10.1016/S0022-2836\(05\)80360-2](https://doi.org/10.1016/S0022-2836(05)80360-2) PMID: [2231712](https://pubmed.ncbi.nlm.nih.gov/2231712/)

25. Sullivan MJ, Petty NK, Beatson SA. Easyfig: a genome comparison visualizer. *Bioinformatics*. 2011; 27(7):1009–10. doi: [10.1093/bioinformatics/btr039](https://doi.org/10.1093/bioinformatics/btr039) PMID: [21278367](https://pubmed.ncbi.nlm.nih.gov/21278367/)
26. Richter M, Rosselló-Móra R, Oliver Glöckner F, Peplies J. JSpeciesWS: a web server for prokaryotic species circumscription based on pairwise genome comparison. *Bioinformatics*. 2016; 32:929–31. doi: [10.1093/bioinformatics/btv681](https://doi.org/10.1093/bioinformatics/btv681) PMID: [26576653](https://pubmed.ncbi.nlm.nih.gov/26576653/)
27. Kurtz S, Phillippy A, Delcher AL, Smoot M, Shumway M, Antonescu C, Salzberg SL. Versatile and open software for comparing large genomes. *Genome Biol*. 2004; 5(2):R12. doi: [10.1186/gb-2004-5-2-r12](https://doi.org/10.1186/gb-2004-5-2-r12) PMID: [14759262](https://pubmed.ncbi.nlm.nih.gov/14759262/)
28. Benada O, Pokorny V. Modification of the polaron sputter-coater unit for glow-discharge activation of carbon support films. *J Electron Microscop Tech*. 1990; 16: 235–9. doi: [10.1002/jemt.1060160304](https://doi.org/10.1002/jemt.1060160304) PMID: [2243279](https://pubmed.ncbi.nlm.nih.gov/2243279/)
29. Ackermann HW, Eisenstark A. The present state of phage taxonomy. *Intervirology*. 1974; 3:201–19. PMID: [4461697](https://pubmed.ncbi.nlm.nih.gov/4461697/)
30. Kropinski AM, Sulakvelidze A, Konczyk P, Poppe C. *Salmonella* phages and prophages—genomics and practical aspects. *Methods Mol Biol*. 2007; 394:133–75. doi: [10.1007/978-1-59745-512-1\\_9](https://doi.org/10.1007/978-1-59745-512-1_9) PMID: [18363236](https://pubmed.ncbi.nlm.nih.gov/18363236/)
31. Schickmaier P, Moser E, Wieland T, Rabsch W, Schmieger H. A comparative study on the frequency of prophages among natural isolates of *Salmonella* and *Escherichia coli* with emphasis on generalized transducers. *Antonie Van Leeuwenhoek*. 1998; 73:49–54. PMID: [9602278](https://pubmed.ncbi.nlm.nih.gov/9602278/)
32. Switt AI, Sulakvelidze A, Wiedmann M, Kropinski AM, Wishart DS, Poppe C, et al. *Salmonella* phages and prophages: Genomics, taxonomy, and applied aspects. *Methods Mol Biol*. 2015; 1225:237–87. doi: [10.1007/978-1-4939-1625-2\\_15](https://doi.org/10.1007/978-1-4939-1625-2_15) PMID: [25253259](https://pubmed.ncbi.nlm.nih.gov/25253259/)
33. Casjens SR, Thuman-Commike PA. Evolution of mosaically related tailed bacteriophage genomes seen through the lens of phage P22 virion assembly. *Virology*. 2011; 411:393–415. doi: [10.1016/j.virol.2010.12.046](https://doi.org/10.1016/j.virol.2010.12.046) PMID: [21310457](https://pubmed.ncbi.nlm.nih.gov/21310457/)
34. Sathyabama S, Kaur G, Arora A, Verma S, Mubin N, Mayilraj S, et al. Genome sequencing, annotation and analysis of *Salmonella enterica* subspecies *salamae* strain DMA-1. *Gut Pathog*. 2014; 6:e8.
35. Ackermann HW. Bacteriophage observations and evolution. *Res Microbiol*. 2003; 154:245–51. doi: [10.1016/S0923-2508\(03\)00067-6](https://doi.org/10.1016/S0923-2508(03)00067-6) PMID: [12798228](https://pubmed.ncbi.nlm.nih.gov/12798228/)
36. Chibani-Chennoufi S, Dillmann ML, Marvin-Guy L, Rami-Shojaei S, Brüssow H. *Lactobacillus plantarum* bacteriophage LP65: a new member of the SPO1-like genus of the family *Myoviridae*. *J Bacteriol*. 2004; 186:7069–7083. doi: [10.1128/JB.186.21.7069-7083.2004](https://doi.org/10.1128/JB.186.21.7069-7083.2004) PMID: [15489418](https://pubmed.ncbi.nlm.nih.gov/15489418/)
37. Juhala RJ, Ford ME, Duda RL, Youlton A, Hatfull GF, Hendrix RW. Genomic sequences of bacteriophages HK97 and HK022: pervasive genetic mosaicism in the lambdoid bacteriophages. *J Mol Biol*. 2000; 299:27–51. doi: [10.1006/jmbi.2000.3729](https://doi.org/10.1006/jmbi.2000.3729) PMID: [10860721](https://pubmed.ncbi.nlm.nih.gov/10860721/)
38. Clark AJ, Inwood W, Cloutier T, Dhillon TS. Nucleotide sequence of coliphage HK620 and the evolution of lambdoid phages. *J Mol Biol*. 2001; 311:657–79. doi: [10.1006/jmbi.2001.4868](https://doi.org/10.1006/jmbi.2001.4868) PMID: [11518522](https://pubmed.ncbi.nlm.nih.gov/11518522/)
39. Pedulla ML, Ford ME, Houtz JM, Karthikeyan T, Wadsworth C, Lewis JA, et al. Origins of highly mosaic mycobacteriophage genomes. *Cell*. 2003; 113:171–82. PMID: [12705866](https://pubmed.ncbi.nlm.nih.gov/12705866/)
40. Proux C, van Sinderen D, Suarez J, Garcia P, Ladero V, Fitzgerald GF, et al. The dilemma of phage taxonomy illustrated by comparative genomics of Sfi21-like *Siphoviridae* in lactic acid bacteria. *J Bacteriol*. 2002; 184:6026–36. doi: [10.1128/JB.184.21.6026-6036.2002](https://doi.org/10.1128/JB.184.21.6026-6036.2002) PMID: [12374837](https://pubmed.ncbi.nlm.nih.gov/12374837/)
41. Desai PT, Porwollik S, Long F, Cheng P, Wollam A, Bhonagiri-Palsikar V, et al. Evolutionary genomics of *Salmonella enterica* subspecies. *MBio*. 2013; 4(2):e00198–13.
